# Supplementary material for: Effect of Adding Pharmacists to Primary Care Teams on Blood Pressure Control in Patients With Type 2 Diabetes
Source: Oxford University Press journal article supplement (doi:10.2337/dc10-1294), 2010-10-07
Supplement: dc101294onlineappendix.pdf [file dc101294onlineappendix.pdf]

**Supplementary Table 1. Randomized Controlled Trials Examining the Effect of Pharmacist Intervention on Blood Pressure Management in Diabetes as the Primary Outcome (Study Characteristics)**

| <b>Study</b>              | <b>Setting / Inclusion Criteria / Sample Size Estimate</b>                                                                                                                                                          | <b># Patients (withdrawals)</b> | <b>Duration (months)</b> | <b>Pharmacist's Activities</b>                                                                                                                                                                                                                                                                                                                                                                                     |
|---------------------------|---------------------------------------------------------------------------------------------------------------------------------------------------------------------------------------------------------------------|---------------------------------|--------------------------|--------------------------------------------------------------------------------------------------------------------------------------------------------------------------------------------------------------------------------------------------------------------------------------------------------------------------------------------------------------------------------------------------------------------|
| Rothman RL, 2005<br>USA   | University-based General Internal Medicine Practice<br>Patient referred to a Pharmacist-led diabetes management clinic<br>$A_{1c} \geq 8\%$<br>Based on 10 mmHg difference in SBP and 1% absolute difference in A1c | 217<br>(23 [11%])               | 12                       | <ul style="list-style-type: none"> <li>• 3 specially trained (Certified Diabetes Educator) pharmacists</li> <li>• 1-hour patient educational session</li> <li>• Evidence-based treatment algorithms for BG, BP, lipids</li> <li>• Follow-up every 2-4 weeks either by phone or in-person</li> <li>• Medication changes made by pharmacists through a collaborative agreement for prescriptive authority</li> </ul> |
| McLean DL, 2008<br>Canada | Pharmacist-Nurse team in community pharmacies<br>$BP > 130/80$<br>Based on 10 mmHg difference in SBP                                                                                                                | 227<br>(16 [7%])                | 6                        | <ul style="list-style-type: none"> <li>• Pharmacist-Nurse team provided education on BP: as a risk factor, causes of high BP, consequences of high BP, diabetes &amp; BP, lifestyle strategies to decrease BP</li> <li>• Medication management recommendations sent to physician</li> </ul>                                                                                                                        |
| Planas, 2009<br>USA       | Community pharmacies<br>Sub-study of a diabetes management study<br>$A_{1c} > 7\%$ (main study)<br>$BP \geq 130/80$ or using an antihypertensive medication<br>Sample size not estimated                            | 52<br>(12 [24%])                | 9                        | <ul style="list-style-type: none"> <li>• Medication therapy management program</li> <li>• Brief physical exam with BP measurement</li> <li>• Education on role of medications &amp; encouraged adherence</li> <li>• Medication management recommendations sent to physician</li> </ul>                                                                                                                             |

**Supplementary Figure 1. Systolic Blood Pressure Changes (Primary Outcome) in Randomized Controlled Trials of Pharmacist Intervention in Diabetes Management**

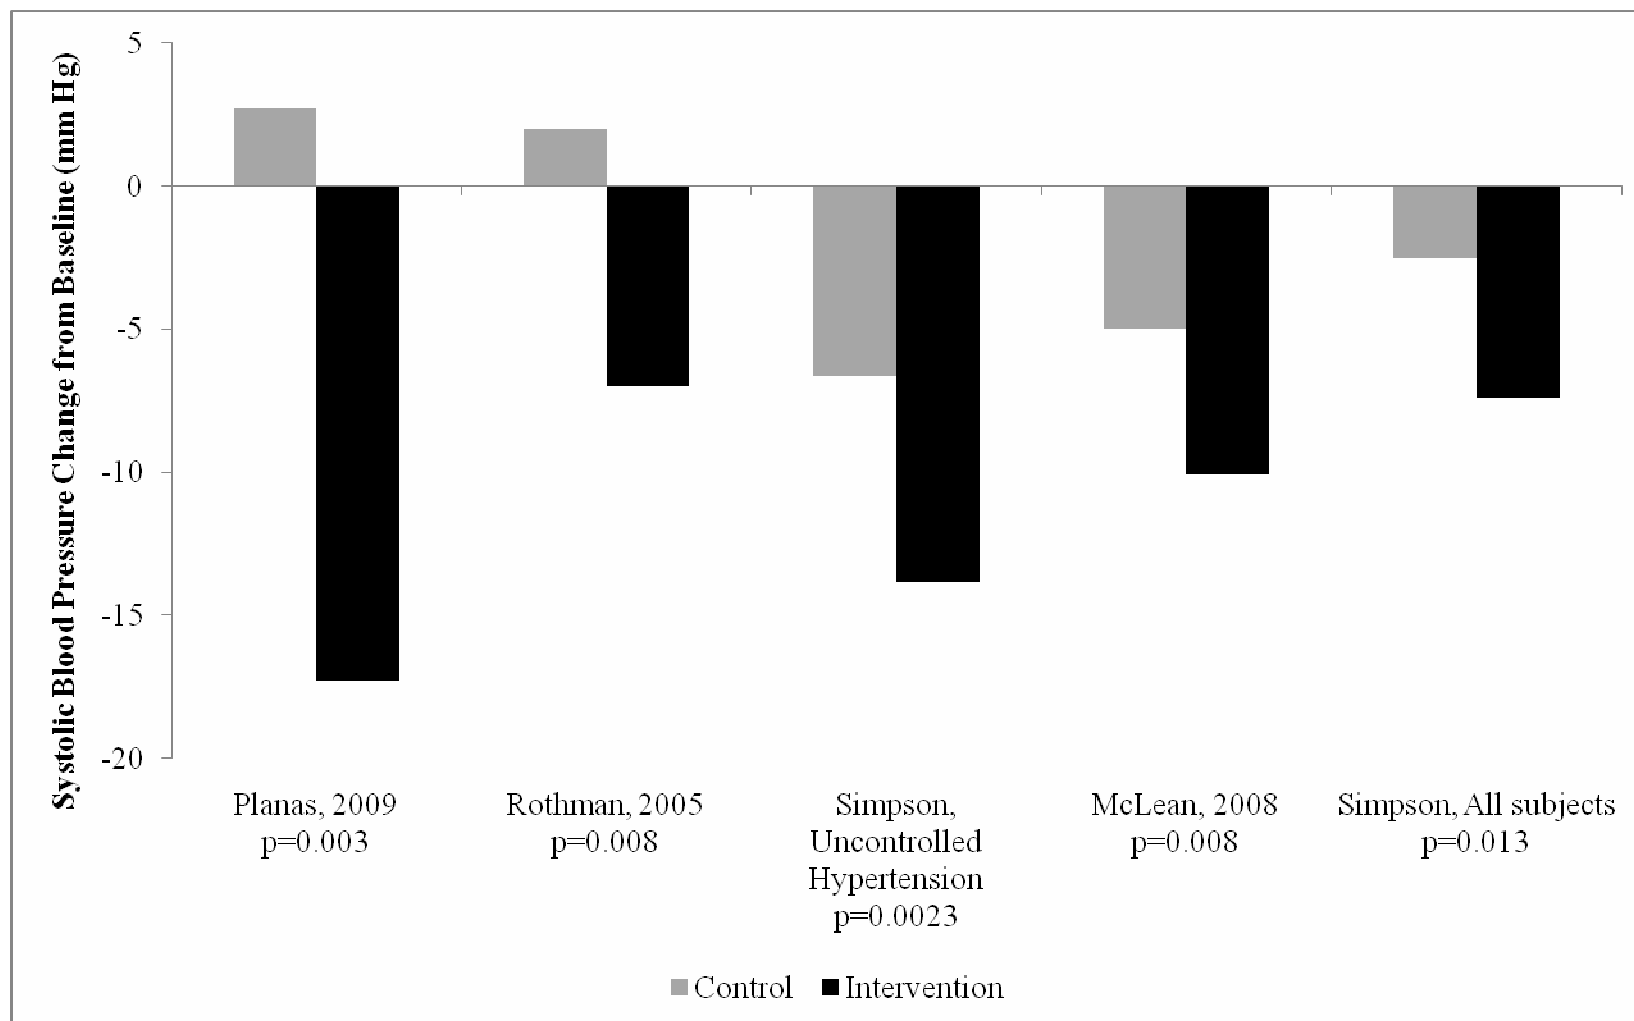

**Supplementary Table 2. Changes in Cardiovascular Risk Factors**

| Parameter                       | Mean Change from Baseline* (95% CI) |                         | Mean Difference†      |
|---------------------------------|-------------------------------------|-------------------------|-----------------------|
|                                 | Control Group                       | Intervention Group      | (95% CI)              |
| A1c (%)                         | 0.03 (-0.22 to 0.28)                | -0.15 (-0.36 to 0.05)   | -0.18 (-0.51 to 0.14) |
| Systolic BP (mmHg)              | -2.5 (-5.2 to 0.1)                  | -7.4 (-10.2 to -4.6)‡   | -4.9 (-8.7 to -1.0)§  |
| Diastolic BP (mmHg)             | 0.6 (-1.4 to 2.6)                   | -2.3 (-4.3 to -0.4)‡    | -2.9 (-5.6 to -0.2)§  |
| Total Cholesterol (mmol/L)      | -0.09 (-0.25 to 0.07)               | -0.23 (-0.41 to -0.05)‡ | -0.14 (-0.38 to 0.10) |
| LDL (mmol/L)                    | -0.10 (-0.24 to 0.05)               | -0.23 (-0.38 to -0.08)‡ | -0.14 (-0.33 to 0.07) |
| HDL (mmol/L)                    | 0.02 (-0.01 to 0.06)                | 0.01 (-0.02 to 0.04)    | -0.02 (-0.06 to 0.03) |
| Triglycerides (mmol/L)          | 0.09 (-0.09 to 0.27)                | -0.09 (-0.26 to 0.07)   | -0.18 (-0.43 to 0.06) |
| Total/HDL Ratio                 | -0.16 (-0.29 to -0.03)‡             | -0.25 (-0.39 to -0.11)‡ | -0.09 (-0.28 to 0.11) |
| UKPDS Risk Engine Score(19) (%) | -1.2 (-2.4 to 0.1)                  | -2.7 (-3.9 to -1.5)‡    | -1.5 (-3.3 to 0.2)    |

95% CI = 95% Confidence Interval; BP = Blood Pressure; LDL = Low Density Lipoprotein; HDL = High Density Lipoprotein

\*Negative values indicate decrease from baseline, Positive values indicate increase from baseline

†Negative values indicate Intervention Group has larger change, Positive values indicate Control Group has larger change

‡paired t-test, p<0.05

§ANOVA, p<0.05

||Mann-Whitney U, p<0.05

**Supplementary Figure 2. Proportion of Subjects Who had Changes to Their Antihypertensive Medications**

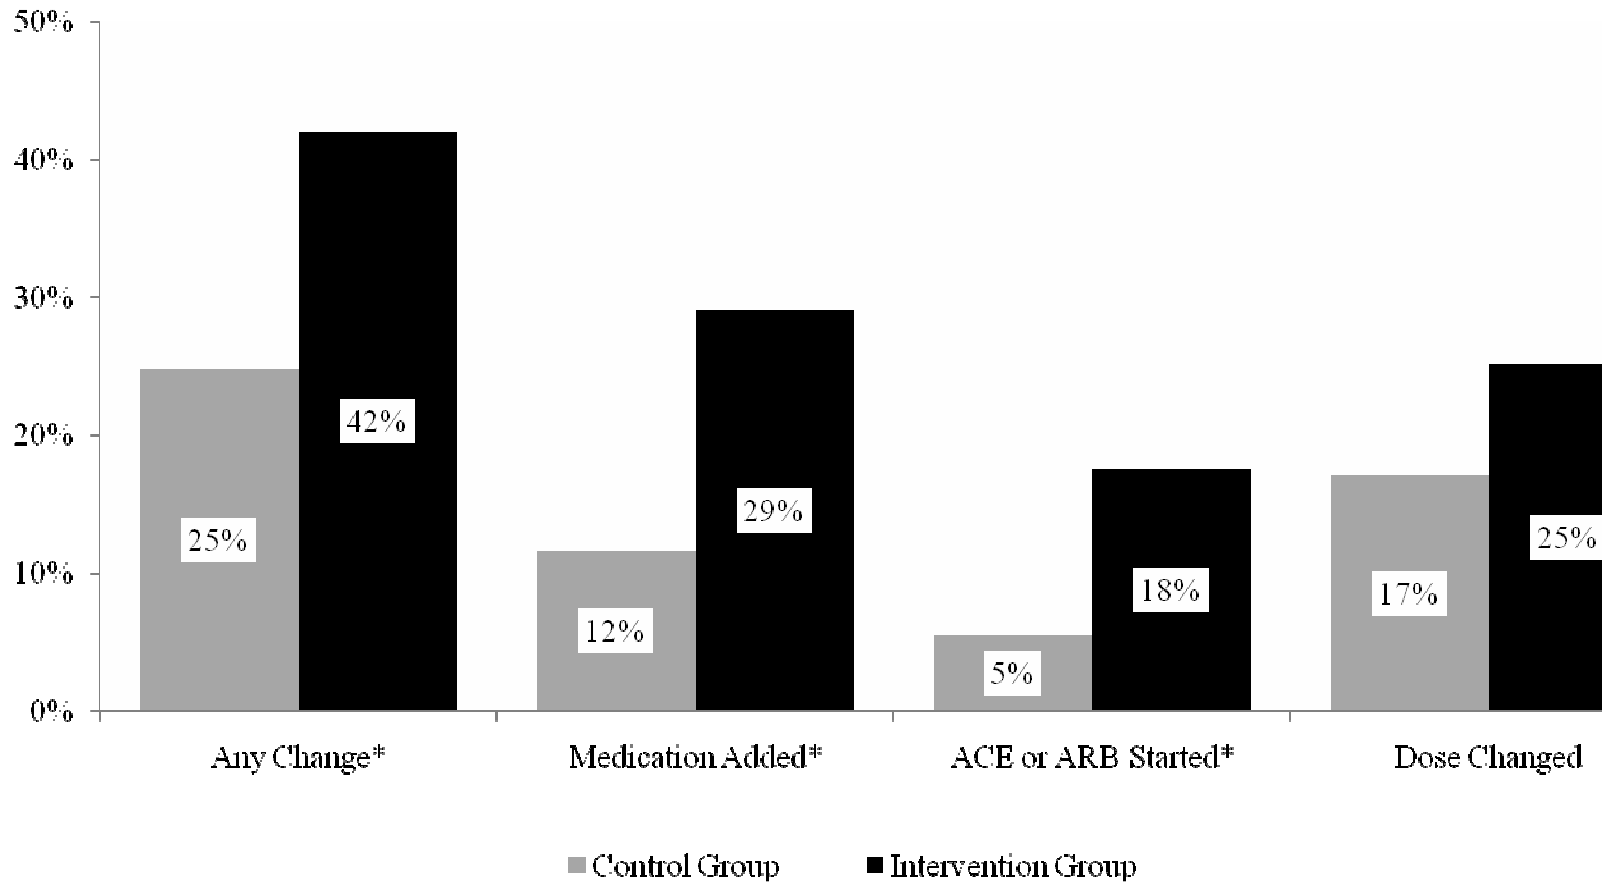

\*p<0.05 (Chi Square)

**Supplementary Table 3. Healthcare-Related Contacts Recorded During Study**

| Healthcare Resource                   | Intervention (n=131)                     |                          |                       | Control (n=129)                          |                          |                       |
|---------------------------------------|------------------------------------------|--------------------------|-----------------------|------------------------------------------|--------------------------|-----------------------|
|                                       | Number of Patients with $\geq 1$ Contact | Total Number of Contacts | Contacts Per Patient* | Number of Patients with $\geq 1$ Contact | Total Number of Contacts | Contacts Per Patient* |
| All Resources†                        | 131                                      | 1439                     | 10 (7-15)             | 129                                      | 438                      | 2 (2-4)               |
| All Resources (excluding pharmacists) | 131                                      | 238                      | 3 (1-6)               | 129                                      | 197                      | 2 (2-5)               |
| Study Pharmacist†                     | 131                                      | 1201                     | 9 (6-12)              | 129                                      | 241                      | 2 (2-2)               |
| Nurse                                 | 18 (14%)                                 | 47                       | 2 (1-4)               | 28 (22%)                                 | 47                       | 2 (1-3)               |
| Dietician                             | 10 (8%)                                  | 16                       | 1 (1-2)               | 13 (10%)                                 | 15                       | 1 (1-2)               |
| Optometrist                           | 30 (23%)                                 | 38                       | 1 (1-1)               | 25 (19%)                                 | 22                       | 1 (1-1)               |
| Podiatrist                            | 8 (6%)                                   | 31                       | 3 (1-6)               | 6 (5%)                                   | 7                        | 1 (1-1)               |
| Endocrinologist                       | 5 (4%)                                   | 13                       | 3 (2-3)               | 9 (7%)                                   | 18                       | 2 (1-2)               |
| Cardiologist                          | 5 (4%)                                   | 8                        | 1 (1-2)               | 8 (6%)                                   | 15                       | 1 (1-2)               |
| Nephrologist                          | 4 (3%)                                   | 7                        | 2 (2-2)               | 1 (1%)                                   | 2                        | 2                     |
| Ophthalmologist                       | 31 (24%)                                 | 42                       | 1 (1-1)               | 39 (30%)                                 | 47                       | 1 (1-1)               |
| Diabetes Education Centre             | 3 (2%)                                   | 4                        | 1 (1-2)               | 7 (5%)                                   | 8                        | 1 (1-1)               |
| Health Link                           | 1 (1%)                                   | 1                        | 1                     | 1                                        | 1                        | 1                     |
| Emergency Room Visit                  | 11 (8%)                                  | 26                       | 1 (1-3)               | 11 (9%)                                  | 11                       | 1 (1-1)               |
| Hospitalization                       | 4 (3%)                                   | 5                        | 1 (1-2)               | 5 (4%)                                   | 4                        | 1 (1-1)               |

\*Reported as Median (Interquartile Range) per patient

†Mann-Whitney U Test (p<0.01)
